# Supplementary material for: Interventions to improve osteoporosis care: a systematic review and meta-analysis
Source: Springer Nature journal article supplement (doi:10.1007/s00198-020-05308-0), 2020-01-28
Supplement: MOESM1 [file 17602096]

***Appendix 1- PubMed queries.***

**Query 1:**

("Osteoporosis"[Mesh] OR "Osteoporosis, Postmenopausal"[Mesh]) AND ("Preventive Health Services"[Mesh] OR "Secondary Prevention"[Mesh] OR "Preventive Medicine"[Mesh] OR "Medical Staff, Hospital/education"[Mesh] OR "Early Medical Intervention"[Mesh]) AND ("Quality of Health Care"[Mesh] OR "Quality Improvement"[Mesh] OR "Practice Patterns, Physicians'"[Mesh] OR "Health Knowledge, Attitudes, Practice"[Mesh] OR "Patient Care Management"[Mesh] OR "Efficiency"[Mesh] OR "Comparative Effectiveness Research"[Mesh] OR "Bone Density"[Mesh] OR "Bone Density Conservation Agents"[Mesh] OR "Densitometry"[Mesh] OR "Drug Prescriptions"[Mesh] OR "Treatment Outcome"[Mesh] OR "Drug Therapy"[Mesh] OR "Osteoporosis/therapy"[Mesh]) AND (("2003/01/01"[PDAT] : "2017/12/31"[PDAT]) AND (English[lang] OR French[lang] OR Spanish[lang]))

**Query 2:**

("Osteoporosis"[Mesh] OR "Osteoporosis, Postmenopausal"[Mesh]) AND ("Guideline Adherence"[Mesh]) AND (("2003/01/01"[PDAT] : "2017/12/31"[PDAT]) AND (English[lang] OR French[lang] OR Spanish[lang]))

**Query 3:**

("Osteoporosis"[Tiab] OR "Osteoporotic"[Tiab]) AND ("Preventive"[Tiab] OR "Prevention"[Tiab] OR "Education"[Tiab] OR "Intervention"[Tiab]) AND ("Quality"[Tiab] OR "Efficiency"[Tiab] OR "Density"[Tiab] OR "Densitometry"[Tiab] OR "Prescription"[Tiab] OR "Prescriptions"[Tiab] OR "Treatment"[Tiab] OR "Treatments"[Tiab] OR "Therapy"[Tiab] OR "Therapies"[Tiab] OR "Improvement"[Tiab] OR "Improvements"[Tiab]) AND (("2013/01/01"[PDAT] : "2017/12/31"[PDAT]) AND (English[lang] OR French[lang] OR Spanish[lang]))
